# Supplementary material
Source: Springer Nature journal article supplement (https://www.springermedizin.de/resource/supplementary/13041_2012_174_MOESM8_ESM.pdf/25657646)

**A**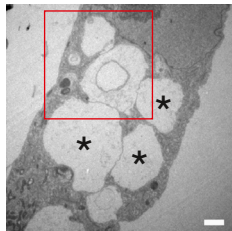**B**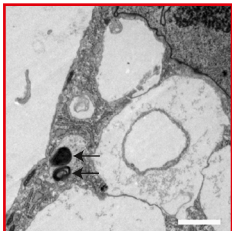**C**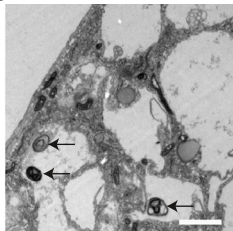**D**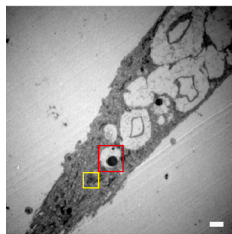**E**

Autophagocytic vacuoles

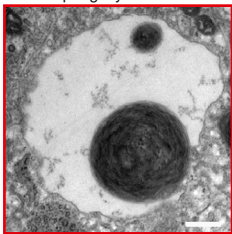**F**

Lipid Droplets

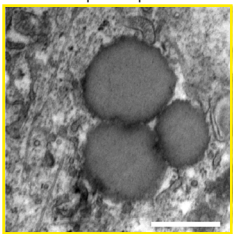**G**

+ Chloroquine

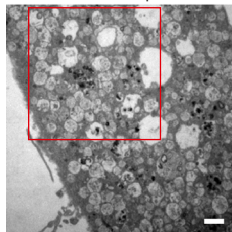**H**

+ Chloroquine

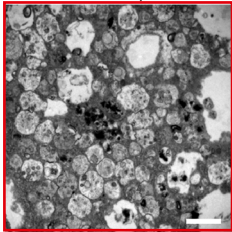**I**

+ Chloroquine

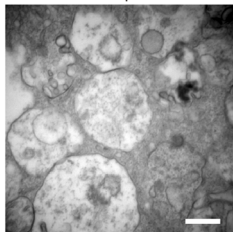

Supplement: MOESM8 [file 25657646]
